# Supplementary material for: The Relationship between Mastitis and Antimicrobial Peptide S100A7 Expression in Dairy Goats
Source: MDPI journal article supplement (doi:10.3390/vetsci10110653), 2023-11-14
Supplement: s1 [file s1]

**Supplemental Table 1.** Ingredients and chemical composition of the postpartum diets on the dry matter (DM) basis

| Ingredient (% of DM)                    | Postpartum | Nutrient composition                   | Postpartum |
|-----------------------------------------|------------|----------------------------------------|------------|
| Alfalfa hay                             | 18.42      | DM (% of fresh)                        | 48.20      |
| Corn                                    | 23.16      | Neutral detergent fiber (NDF, %)       | 37.70      |
| Wheat bran                              | 8.37       | Acid detergent fiber (ADF, %)          | 17.40      |
| Soybean meal                            | 9.02       | Crude protein (CP, %)                  | 16.40      |
| Wheat straw                             | 0.00       | Starch (%)                             | 25.40      |
| Corn Silage                             | 30.66      | Ether extract (%)                      | 3.20       |
| Corn germ meal                          | 3.26       | Calcium (Ca, %)                        | 0.66       |
| Cottonseed meal                         | 5.12       | Phosphorus (P, %)                      | 0.37       |
| Calcium hydrophosphate                  | 0.51       | Magnesium (Mg, %)                      | 0.19       |
| Limestone                               | 0.46       | Sulfur (S, %)                          | 0.20       |
| Sodium carbonate                        | 0.38       | Chloride (Cl, %)                       | 0.25       |
| Sodium chloride                         | 0.45       | DCAD (mEq/kg of DM) <sup>2</sup>       | +733       |
| Mineral and vitamin premix <sup>1</sup> | 0.19       | NE <sub>L</sub> (Mcal/kg) <sup>3</sup> | 1.62       |

<sup>1</sup> The mineral-vitamin premix provided the following per kg of diets: vitamin A 250,000 IU, vitamin D 23,250 IU, vitamin E 1500 IU, manganese 800 mg, zinc 1800 mg, copper 370 mg, iron 2200 mg, cobalt 50 mg, iodine 30 mg, selenium 30 mg.

<sup>2</sup> The dietary cation-anion difference (DCAD) was calculated using the formula  $DCAD \text{ (mEq/kg of DM)} = (\text{Na} + \text{K}) - (\text{Cl}^{++-} + \text{S}^{2-})$ .

<sup>3</sup> Net energy for lactation (NE<sub>L</sub>) was estimated using CPM-Dairy software (version 3.0.8.1).

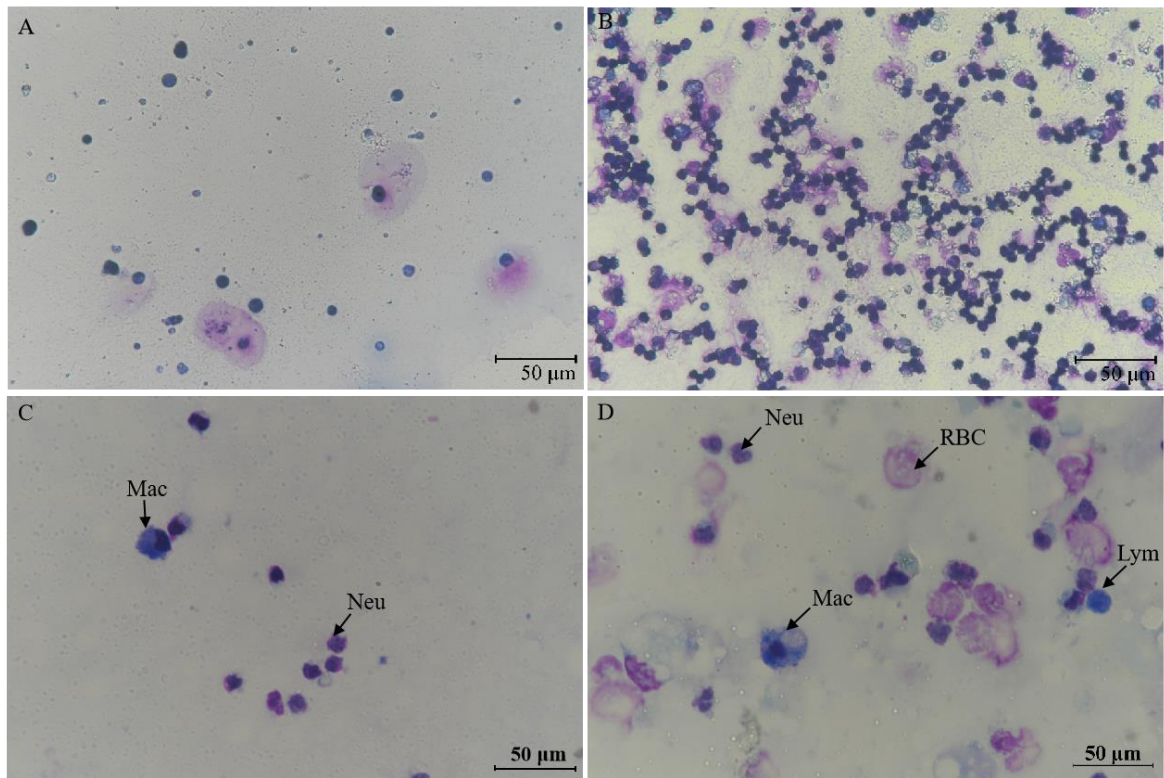

**Figure S1.** Stain of somatic cells in healthy dairy goat and mastitis dairy goat. (A,C) The represented images of healthy dairy goat milk somatic cells stain; (B,D) the represent images of mastitis dairy goat milk somatic cells stain; SCC in healthy and mastitis goat was  $4.4 \times 10^5$  and  $7.238 \times 10^6$  cells/mL, respectively. Mac = macrophages; Lym = lymphocytes; Neu = neutrophils; RBC = red blood cell. Scale bar = 50  $\mu$ m.
